# Supplementary material for: How to Obtain Maximum Environmental Applicability from Natural Silicates
Source: MDPI journal article supplement (doi:10.3390/catal12050519), 2022-05-05
Supplement: s1 [file s1]

Archive with 1 entries (1 files):
- catalysts-1701586-supplementary.pdf
